# Supplementary material for: Sympathetic Effect of Auricular Transcutaneous Vagus Nerve Stimulation on Healthy Subjects: A Crossover Controlled Clinical Trial Comparing Vagally Mediated and Active Control Stimulation Using Microneurography
Source: PubMed Central journal article supplement (PMC7744823; doi:10.3389/fphys.2020.599896), 2020-12-03
Supplement: Table_1.pdf [file Table_1.pdf]

Supplemental data:

**Additional table 1:** Changes on HR, HRV, blood pressure and MSNA parameters

| Variable                            | n  | Baseline    | Stimulation | Recovery    |
|-------------------------------------|----|-------------|-------------|-------------|
| <b>HR, bpm</b>                      |    |             |             |             |
| Active control (5Hz)                | 28 | 61.7 ± 8.4  | 60.6 ± 7.7  | 61.0 ± 7.4  |
| aLL-tVNS-5Hz                        | 28 | 61.3 ± 9.2  | 61.0 ± 8.7  | 61.5 ± 8.3  |
| aLL-tVNS-20Hz                       | 28 | 61.5 ± 8.3  | 61.4 ± 8.3  | 61.9 ± 8.0  |
| <b>RMSSD, ms</b>                    |    |             |             |             |
| Active control (5Hz)                | 28 | 47.7 ± 25.8 | 47.9 ± 24.8 | 48.5 ± 25.6 |
| aLL-tVNS-5Hz                        | 28 | 47.5 ± 25.4 | 48.4 ± 26.5 | 49.0 ± 27.6 |
| aLL-tVNS-20Hz                       | 28 | 46.4 ± 23.3 | 45.3 ± 23.7 | 47.8 ± 24.5 |
| <b>SDRR, ms</b>                     |    |             |             |             |
| Active control (5Hz)                | 28 | 70.5 ± 29.7 | 67.4 ± 25.7 | 73.7 ± 28.3 |
| aLL-tVNS-5Hz                        | 28 | 63.3 ± 22.4 | 66.9 ± 27.7 | 71.0 ± 25.3 |
| aLL-tVNS-20Hz                       | 28 | 64.3 ± 25.0 | 62.3 ± 24.7 | 72.0 ± 28.4 |
| <b>LF component, ms<sup>2</sup></b> |    |             |             |             |
| Active control (5Hz)                | 28 | 3120 ± 3269 | 2392 ± 2662 | 2340 ± 2299 |
| aLL-tVNS-5Hz                        | 28 | 2222 ± 2887 | 2616 ± 3303 | 2818 ± 2979 |
| aLL-tVNS-20Hz                       | 28 | 1880 ± 1784 | 2104 ± 2131 | 2655 ± 2732 |
| <b>HF component, ms<sup>2</sup></b> |    |             |             |             |
| Active control (5Hz)                | 28 | 1711 ± 2064 | 1541 ± 1760 | 1488 ± 1577 |
| aLL-tVNS-5Hz                        | 28 | 1789 ± 3201 | 1847 ± 3486 | 1891 ± 2421 |
| aLL-tVNS-20Hz                       | 28 | 1292 ± 1555 | 1416 ± 1630 | 1616 ± 1809 |
| <b>LF component, % power</b>        |    |             |             |             |
| Active control (5Hz)                | 28 | 36.7 ± 17.8 | 33.1 ± 13.2 | 34.3 ± 12.7 |
| aLL-tVNS-5Hz                        | 28 | 35.9 ± 15.0 | 33.0 ± 13.9 | 32.7 ± 11.5 |
| aLL-tVNS-20Hz                       | 28 | 34.7 ± 14.0 | 34.1 ± 14.1 | 32.0 ± 14.4 |
| <b>HF component, % power</b>        |    |             |             |             |
| Active control (5Hz)                | 28 | 20.5 ± 10.0 | 20.9 ± 9.3  | 20.8 ± 7.6  |
| aLL-tVNS-5Hz                        | 28 | 26.7 ± 11.2 | 21.2 ± 11.1 | 20.3 ± 9.9  |
| aLL-tVNS-20Hz                       | 28 | 21.8 ± 10.5 | 20.9 ± 9.1  | 18.9 ± 9.7  |
| <b>LF/HF ratio, % power ratio</b>   |    |             |             |             |
| Active control (5Hz)                | 28 | 2.2 ± 1.4   | 1.8 ± 1.1   | 1.9 ± 1.0   |
| aLL-tVNS-5Hz                        | 28 | 1.6 ± 1.1   | 2.1 ± 1.5   | 2.0 ± 1.3   |
| aLL-tVNS-20Hz                       | 28 | 2.0 ± 1.5   | 2.0 ± 1.2   | 2.1 ± 1.5   |
| <b>SBP, mmHg</b>                    |    |             |             |             |

|                              |    |             |             |              |
|------------------------------|----|-------------|-------------|--------------|
| Active control (5Hz)         | 28 | 115 ± 11    | 115 ± 12    | 114 ± 12     |
| aLL-tVNS-5Hz                 | 28 | 116 ± 11    | 115 ± 10    | 115 ± 10     |
| aLL-tVNS-20Hz                | 28 | 115 ± 12    | 115 ± 10    | 115 ± 10     |
| <b>DBP, mmHg</b>             |    |             |             |              |
| Active control (5Hz)         | 28 | 58 ± 9      | 58 ± 9      | 58 ± 10      |
| aLL-tVNS-5Hz                 | 28 | 59 ± 9      | 59 ± 9      | 59 ± 9       |
| aLL-tVNS-20Hz                | 28 | 59 ± 9      | 59 ± 8      | 59 ± 9       |
| <b>MBP, mmHg</b>             |    |             |             |              |
| Active control (5Hz)         | 28 | 77 ± 9      | 77 ± 10     | 77 ± 10      |
| aLL-tVNS-5Hz                 | 28 | 78 ± 9      | 77 ± 8      | 78 ± 9       |
| aLL-tVNS-20Hz                | 28 | 77 ± 10     | 77 ± 8      | 77 ± 9       |
| <b>BF, bursts per minute</b> |    |             |             |              |
| Active control (5Hz)         | 16 | 17.6 ± 10.5 | 12.8 ± 10.1 | 16.1 ± 10.1  |
| aLL-tVNS-5Hz                 | 16 | 19.0 ± 10.5 | 14.7 ± 10.7 | 17.1 ± 9.8   |
| aLL-tVNS-20Hz                | 15 | 16.1 ± 11.1 | 12.6 ± 11.8 | 17.9 ± 11.3  |
| <b>MSNA activity (%)</b>     |    |             |             |              |
| Active control (5Hz)         | 16 | 100         | 89.4 ± 40.0 | 92.6 ± 27.5  |
| aLL-tVNS-5Hz                 | 16 | 100         | 81.3 ± 26.2 | 90.6 ± 25.6  |
| aLL-tVNS-20Hz                | 15 | 100         | 87.3 ± 29.2 | 131.4 ± 29.5 |

---
